# Supplementary material
Source: publisher figshare collection journal article supplement (https://tandf.figshare.com/ndownloader/files/13849319)
Supplement: Supplementary file 1 [file 13849319]

## Sheet: Hoja1
	SUPPLEMENTARY FILE 1. Bivariate correlations between characteristics of infants and mother and inorganic elements.
			Trace elements					Elements included in the ATSDR´s priority pollutant
			Al	Co	Fe	Mn	Mo	Ag	As	Ba	Be	Cd	Cr	Cu	Hg	Ni	Pb	Sb	Se	Th	Tl	U	V	Zn
	Birth weight	Spearman r	0.069771	0.144364	-0.0201447	0.238693	0.0230225	0.122875	-0.0368188	0.0992142	0.0324262	0.226562	-0.0731407	-0.0230034	0.175341	-0.0605343	0.17237	0.171649	-0.00791307	0.243165	0.120028	0.240128	0.11173	0.0624872
		p value	0.583805	0.251242	0.873451	0.0555126	0.855555	0.432462	0.770912	0.439149	0.797624	0.069549	0.565722	0.855673	0.162395	0.631929	0.169743	0.197618	0.950117	0.0548141	0.340908	0.0559749	0.375563	0.620956
	Birth length	Spearman r	-0.0192755	0.135782	-0.0192807	0.242784	0.100375	0.0998959	0.048402	-0.0281728	0.0844991	0.227933	0.228015	-0.00347112	0.20415	0.120845	0.183724	0.0310569	-0.00548805	0.182796	0.146327	0.187266	-0.0172301	0.051558
		p value	0.880808	0.284703	0.879803	0.0532341	0.430012	0.529062	0.704088	0.827927	0.506781	0.0700713	0.0722834	0.978283	0.10564	0.341502	0.14616	0.818608	0.96567	0.155009	0.248594	0.141656	0.892506	0.685768
	Perímetro craneal (cm)	Spearman r	0.117	0.250711	0.120848	0.246632	0.186463	-0.0327044	0.143714	0.0560291	-0.0323537	0.291981	0.267317	0.158019	0.155924	0.118517	0.214906	0.00306157	0.132527	0.177446	0.0322724	0.189338	0.152443	0.18465
		p value	0.361135	0.0456953	0.341491	0.0494571	0.140138	0.837098	0.257236	0.665353	0.799654	0.0192285	0.0341767	0.212364	0.218567	0.350953	0.0881293	0.981967	0.296516	0.167663	0.800147	0.137224	0.229151	0.144103
	APGAR 1	Spearman r	-0.0203621	0.0713843	0.0373415	-0.0347778	-0.284672	-0.301921	-0.316084	-0.0455219	-0.0254005	-0.312959	0.0770258	0.0970993	-0.133818	0.0406746	-0.0145333	-0.0413636	0.0275577	0.0603911	0.0720622	0.0707798	-0.153701	0.0588599
		p value	0.873115	0.572024	0.767751	0.783293	0.021542	0.0491056	0.0103166	0.723139	0.84082	0.0111388	0.545205	0.441614	0.287905	0.747681	0.908521	0.757862	0.827501	0.638233	0.56837	0.578364	0.221553	0.641401
	Mother age at delivery	Spearman r	0.120815	0.0408117	-0.00305858	0.14944	-0.0106964	0.21913	0.109622	0.128697	0.0600356	0.129395	-0.0863545	-0.109702	0.10407	-0.181257	-0.111453	0.0569912	-0.068485	0.158631	0.152521	0.147626	0.0995599	0.0150593
		p value	0.345579	0.748823	0.980863	0.238562	0.933147	0.163232	0.388527	0.318818	0.637466	0.308179	0.500979	0.388178	0.413144	0.151749	0.380605	0.673694	0.590775	0.218151	0.228908	0.248246	0.433786	0.905983
	BMI	Spearman r	0.00946096	0.359197	-0.0544892	0.120731	0.0407213	0.1538	0.0809575	0.196783	-0.0348291	0.31909	0.107979	0.115303	0.332965	0.0854385	0.153507	0.328425	-0.00219374	0.348168	0.238832	0.310883	0.133888	-0.0210951
		p value	0.940853	0.00329804	0.666394	0.338068	0.7474	0.324776	0.521465	0.122153	0.782981	0.00957589	0.395716	0.360391	0.00672497	0.498596	0.222143	0.0118358	0.986163	0.00517039	0.0553657	0.0124074	0.28765	0.867533
	Gestational age	Spearman r	0.163699	0.0685948	0.105198	0.139697	0.034142	0.24179	0.0704489	0.0637448	0.0776777	0.0603919	-0.388289	0.107524	0.109081	0.0175257	0.075185	0.129966	0.161165	0.0943537	0.0125525	0.0830109	0.0523516	0.133742
		p value	0.196178	0.587172	0.404283	0.267055	0.787161	0.118269	0.577084	0.61966	0.53853	0.632732	0.00152186	0.393915	0.38706	0.889794	0.551681	0.330862	0.199652	0.462001	0.920946	0.51432	0.678752	0.288182
	* Significant associations were highlighted in bold.
